# Supplementary material for: Benefit of Biennial Fecal Occult Blood Screening on Colorectal Cancer in England: A Population-Based Case-Control Study
Source: PubMed Central journal article supplement — J Natl Cancer Inst. 2022 May 16;114(9):1262–9. doi: 10.1093/jnci/djac100 (PMC9468279; doi:10.1093/jnci/djac100), 2022-05-16

## Supplementary Methods

### Estimating the cumulative risk per 100,000 in a hypothetical cohort of individuals aged 60 to 79 in the general population and among screened individuals.

We estimate the average age-specific rate (for each gender) as follows:

- Rate at age 60 = 40% of observed rate at ages 55-59 and 60% of observed rate at ages 60-64
- Rate at age 61 = 20% of observed rate at ages 55-59 and 80% of observed rate at ages 60-64
- Rate at age 62 = observed rate at ages 60-64
- Rate at age 63 = 80% of observed rate at ages 60-64 and 20% of observed rate at ages 65-69
- Rate at age 64 = 60% of observed rate at ages 60-64 and 40% of observed rate at ages 65-69

The age-specific rates for both genders were averaged and used to estimate the cumulative risk from age 60 to 79 in the population.

To estimate rates in screened individuals, average age-specific population rates were multiplied by the weighted average of the odds ratios (ORs) within 12 months of a screening test for ages at which screening is offered (i.e., 60, 62, 64, etc. up to age 74, Table S4).

For the non-screening age groups (i.e., 61, 63, 65, etc. up to age 79), the average of the ORs for one year and for two or more years (i.e., 180-365 days and 2+ years respectively, as shown in Table S4) were used. These estimates were corrected for self-selection bias.

### Estimation of risk ratios by Duke's stage

To estimate the rate of advanced (Dukes' stage D) CRC per 100,000 individuals in the population, the average gender-age specific rates were multiplied by the proportion of cases suspected to be Dukes' stage D among all unscreened cases in the study (33% for males and 32% for females) before averaging the risk. To obtain the risk among those screened we multiply the average risk in the population by the weighted average of the odds ratios for Dukes' stage D (see table below) as detailed above.

## Supplementary Tables

Supplementary Table 1. Colorectal cancers diagnosed in the Nottingham RCT after a median follow-up of 19.5 years by stage at diagnosis, invitational and attendance status

| Stage                     | Screened-invited |                           | Invitational status |                           | Not invited - unscreened |                           | Risk ratio (Not screened-invited/ Not invited-unscreened)<br>OR (95% CI) |
|---------------------------|------------------|---------------------------|---------------------|---------------------------|--------------------------|---------------------------|--------------------------------------------------------------------------|
|                           | N                | Rate per 1,000 population | N                   | Rate per 1,000 population | N                        | Rate per 1,000 population |                                                                          |
| Dukes A                   | 238              | 5.31                      | 76                  | 2.50                      | 258                      | 3.44                      | 0.73                                                                     |
| Dukes' B                  | 398              | 8.88                      | 321                 | 10.55                     | 735                      | 9.80                      | 1.08                                                                     |
| Dukes' C                  | 358              | 7.98                      | 233                 | 7.66                      | 653                      | 8.71                      | 0.88                                                                     |
| Dukes' D                  | 224              | 5.00                      | 228                 | 7.50                      | 468                      | 6.24                      | <b>1.20 (1.03, 1.41)</b>                                                 |
| Dukes' B+                 | 980              | 21.86                     | 782                 | 25.71                     | 1856                     | 24.75                     | <b>1.04 (0.96, 1.13)</b>                                                 |
| Dukes' C+                 | 582              | 12.98                     | 461                 | 15.16                     | 1121                     | 14.95                     | 1.01                                                                     |
| Total cancers             | 1320             | 29.44                     | 959                 | 31.53                     | 2354                     | 31.39                     | <b>1.00 (0.93, 1.08)</b>                                                 |
| Total population in study | 44838            |                           | 30415               |                           | 74998                    |                           |                                                                          |

\* Risk ratios in bold are used for self-selection correction. We use the same correction for Dukes' B or worse as for Dukes' C or worse

**Supplementary Table 2. Number of Invitations by screening status among eligible individuals**

| Number of invitations | Invited - not screened |       | Invited – screened |       | Total |      |
|-----------------------|------------------------|-------|--------------------|-------|-------|------|
|                       | N                      | (%)   | N                  | (%)   | N     | (%)  |
| 1                     | 7941                   | 49.2% | 8199               | 50.8% | 16140 | 100% |
| 2                     | 7101                   | 39.0% | 11084              | 61.0% | 18185 | 100% |
| 3                     | 2499                   | 27.6% | 6556               | 72.4% | 9055  | 100% |
| 4                     | 57                     | 19.5% | 235                | 80.5% | 292   | 100% |

**Supplementary Table 3. Corrected odds ratio of bowel cancer by screening status and time since last screening test - results for the main analysis.**

| Invitational status -<br>screening status | Controls |        | Cases |        | cOdds ratio (95%<br>CI) <sup>a</sup> |
|-------------------------------------------|----------|--------|-------|--------|--------------------------------------|
|                                           | N        | (%)    | N     | (%)    |                                      |
| <b>All Stages</b>                         |          |        |       |        |                                      |
| Invited - unscreened                      | 11695    | (40.3) | 5903  | (40.3) | Reference                            |
| Invited - time since last test            |          |        |       |        |                                      |
| <30 days                                  | 806      | (2.8)  | 2131  | (14.6) | 9.66 (8.17, 11.43)                   |
| 30-60 days                                | 1027     | (3.5)  | 885   | (6.0)  | 3.03 (2.56, 3.59)                    |
| 60-90 days                                | 947      | (3.3)  | 301   | (2.1)  | 0.89 (0.73, 1.08)                    |
| 90-180 days                               | 1696     | (5.8)  | 468   | (3.2)  | 0.52 (0.44, 0.63)                    |
| 180-365 days                              | 2683     | (9.2)  | 895   | (6.1)  | 0.53 (0.46, 0.62)                    |
| 365-730 days                              | 5776     | (19.9) | 2208  | (15.1) | 0.67 (0.58, 0.77)                    |
| 2 years                                   | 2263     | (7.8)  | 891   | (6.1)  | 0.88 (0.75, 1.02)                    |
| 3 or more years                           | 2143     | (7.4)  | 954   | (6.5)  | 0.83 (0.71, 0.96)                    |
| <b>Dukes stage B or worse</b>             |          |        |       |        |                                      |
| Invited - unscreened                      | 9082     | (40.0) | 5061  | (44.2) | Reference                            |
| Invited - time since last test            |          |        |       |        |                                      |
| <30 days                                  | 565      | (2.5)  | 1350  | (11.8) | 7.36 (6.08, 8.90)                    |
| 30-60 days                                | 721      | (3.2)  | 550   | (4.8)  | 2.30 (1.89, 2.80)                    |
| 60-90 days                                | 689      | (3.0)  | 204   | (1.8)  | 0.74 (0.59, 0.92)                    |
| 90-180 days                               | 1309     | (5.8)  | 355   | (3.1)  | 0.48 (0.40, 0.59)                    |
| 180-365 days                              | 2158     | (9.5)  | 703   | (6.1)  | 0.52 (0.43, 0.62)                    |
| 365-730 days                              | 4694     | (20.7) | 1757  | (15.4) | 0.65 (0.55, 0.76)                    |
| 2 years                                   | 1713     | (7.5)  | 697   | (6.1)  | 0.85 (0.71, 1.02)                    |

|                 |      |       |     |       |                   |
|-----------------|------|-------|-----|-------|-------------------|
| 3 or more years | 1771 | (7.8) | 764 | (6.7) | 0.79 (0.66, 0.94) |
|-----------------|------|-------|-----|-------|-------------------|

**Dukes stage C and D**

|                      |      |        |      |        |           |
|----------------------|------|--------|------|--------|-----------|
| Invited - unscreened | 5626 | (40.4) | 3297 | (47.0) | Reference |
|----------------------|------|--------|------|--------|-----------|

Invited - time since last test

|                 |      |        |      |        |                   |
|-----------------|------|--------|------|--------|-------------------|
| <30 days        | 318  | (2.3)  | 706  | (10.1) | 6.18 (4.96, 7.69) |
| 30-60 days      | 399  | (2.9)  | 301  | (4.3)  | 2.06 (1.64, 2.59) |
| 60-90 days      | 413  | (3.0)  | 115  | (1.6)  | 0.62 (0.48, 0.81) |
| 90-180 days     | 816  | (5.9)  | 220  | (3.1)  | 0.45 (0.36, 0.56) |
| 180-365 days    | 1334 | (9.6)  | 443  | (6.3)  | 0.51 (0.42, 0.62) |
| 365-730 days    | 2879 | (20.7) | 1074 | (15.3) | 0.62 (0.53, 0.74) |
| 2 years         | 1032 | (7.4)  | 405  | (5.8)  | 0.75 (0.62, 0.92) |
| 3 or more years | 1092 | (7.9)  | 453  | (6.5)  | 0.72 (0.59, 0.87) |

**Dukes stage D**

|                      |      |        |      |        |           |
|----------------------|------|--------|------|--------|-----------|
| Invited - unscreened | 2672 | (40.4) | 1926 | (57.7) | Reference |
|----------------------|------|--------|------|--------|-----------|

Invited - time since last test

|                 |      |        |     |        |                   |
|-----------------|------|--------|-----|--------|-------------------|
| <30 days        | 108  | (1.6)  | 116 | (3.5)  | 2.38 (1.57, 3.60) |
| 30-60 days      | 125  | (1.9)  | 84  | (2.5)  | 1.46 (0.95, 2.24) |
| 60-90 days      | 160  | (2.4)  | 42  | (1.3)  | 0.56 (0.35, 0.90) |
| 90-180 days     | 398  | (6.0)  | 102 | (3.1)  | 0.46 (0.31, 0.68) |
| 180-365 days    | 668  | (10.1) | 192 | (5.7)  | 0.49 (0.34, 0.70) |
| 365-730 days    | 1450 | (21.9) | 474 | (14.2) | 0.43 (0.37, 0.49) |
| 2 years         | 466  | (7.0)  | 183 | (5.5)  | 0.56 (0.46, 0.69) |
| 3 or more years | 575  | (8.7)  | 221 | (6.6)  | 0.74 (0.52, 1.05) |

<sup>a</sup> Corrected for self-selection: 1.00 for all Stages, 1.04 up to Dukes' C or worse and 1.20 for Dukes' D.

**Supplementary Table 4. Odds ratios and corrected odds ratios (cOR) of being diagnosed with CRC by age and Duke's stage used to estimate the cumulative risk of CRC in a hypothetical cohort.**

| Invitational status - screening status | Controls (N)      | Cases (N) | OR    | Average crude OR | cOR (used in Figure 4) | Controls (N)   | Cases (N) | OR   | Average crude OR | cOR (used in Figure 4) |
|----------------------------------------|-------------------|-----------|-------|------------------|------------------------|----------------|-----------|------|------------------|------------------------|
| <b>Age 60 to &lt;62 years</b>          | <b>All Stages</b> |           |       |                  |                        | <b>Stage D</b> |           |      |                  |                        |
| Invited - unscreened                   | 2543              | 1024      | 1     |                  |                        | 470            | 299       | 1    |                  |                        |
| Invited - time since last test         |                   |           |       |                  |                        |                |           |      |                  |                        |
| <30 days                               | 244               | 593       | 12.31 |                  |                        | 24             | 25        | 2.21 |                  |                        |
| 30-60 days                             | 288               | 217       | 3.59  |                  |                        | 27             | 22        | 1.72 |                  |                        |
| 60-90 days                             | 225               | 55        | 0.81  |                  |                        | 33             | 6         | 0.36 |                  |                        |
| 90-180 days                            | 360               | 102       | 0.58  |                  |                        | 62             | 22        | 0.57 |                  |                        |
| 180-365 days                           | 435               | 166       | 0.65  | 1.86             | 1.88                   | 101            | 27        | 0.34 | 0.67             | 0.93                   |
| 365-730 days                           | 738               | 311       | 0.79  |                  |                        | 186            | 59        | 0.45 |                  |                        |
| 2 years+                               | 222               | 75        | 1.09  | 0.94             | 0.95                   | 29             | 10        | 0.54 | 0.50             | 0.69                   |
| <b>Age 62 to &lt;74years</b>           | <b>All Stages</b> |           |       |                  |                        | <b>Stage D</b> |           |      |                  |                        |
| Invited - unscreened                   | 8525              | 4383      | 1     |                  |                        | 1975           | 1433      | 1    |                  |                        |
| Invited - time since last test         |                   |           |       |                  |                        |                |           |      |                  |                        |
| <30 days                               | 581               | 1614      | 9.13  |                  |                        | 77             | 90        | 1.76 |                  |                        |
| 30-60 days                             | 712               | 666       | 3.00  |                  |                        | 93             | 65        | 1.06 |                  |                        |
| 60-90 days                             | 746               | 246       | 0.89  |                  |                        | 128            | 35        | 0.42 |                  |                        |
| 90-180 days                            | 1347              | 369       | 0.53  |                  |                        | 316            | 83        | 0.34 |                  |                        |
| 180-365 days                           | 2062              | 696       | 0.54  | 1.49             | 1.50                   | 520            | 149       | 0.34 | 0.53             | 0.73                   |
| 365-730 days                           | 4693              | 1763      | 0.66  |                  |                        | 1175           | 392       | 0.44 |                  |                        |
| 2 years+                               | 1903              | 735       | 0.87  | 0.77             | 0.77                   | 440            | 150       | 0.58 | 0.51             | 0.71                   |

| <b>Aged 74 to 79 years</b>     | <b>All Stages</b> |      |      |      |      | <b>Stage D</b> |     |      |      |      |
|--------------------------------|-------------------|------|------|------|------|----------------|-----|------|------|------|
| Invited - unscreened           | 2882              | 1573 | 1    |      |      | 733            | 554 | 1    |      |      |
| Invited - time since last test |                   |      |      |      |      |                |     |      |      |      |
| <30 days                       | 131               | 355  | 9.14 |      |      | 21             | 19  | 1.44 |      |      |
| 30-60 days                     | 209               | 147  | 2.25 |      |      | 21             | 15  | 1.10 |      |      |
| 60-90 days                     | 164               | 55   | 0.86 |      |      | 30             | 9   | 0.43 |      |      |
| 90-180 days                    | 294               | 80   | 0.47 |      |      | 90             | 18  | 0.23 |      |      |
| 180-365 days                   | 522               | 153  | 0.43 | 1.35 | 1.37 | 154            | 41  | 0.31 | 0.46 | 0.64 |
| 365-730 days                   | 1081              | 411  | 0.62 |      |      | 276            | 85  | 0.36 |      |      |
| 2 years+                       | 631               | 282  | 0.84 | 0.73 | 0.74 | 153            | 58  | 0.51 | 0.43 | 0.60 |

## Supplementary Figures

Supplementary Figure 1. Odds ratio of colorectal cancer among those screened by stage and age at diagnosis in the main and sensitivity analyses.

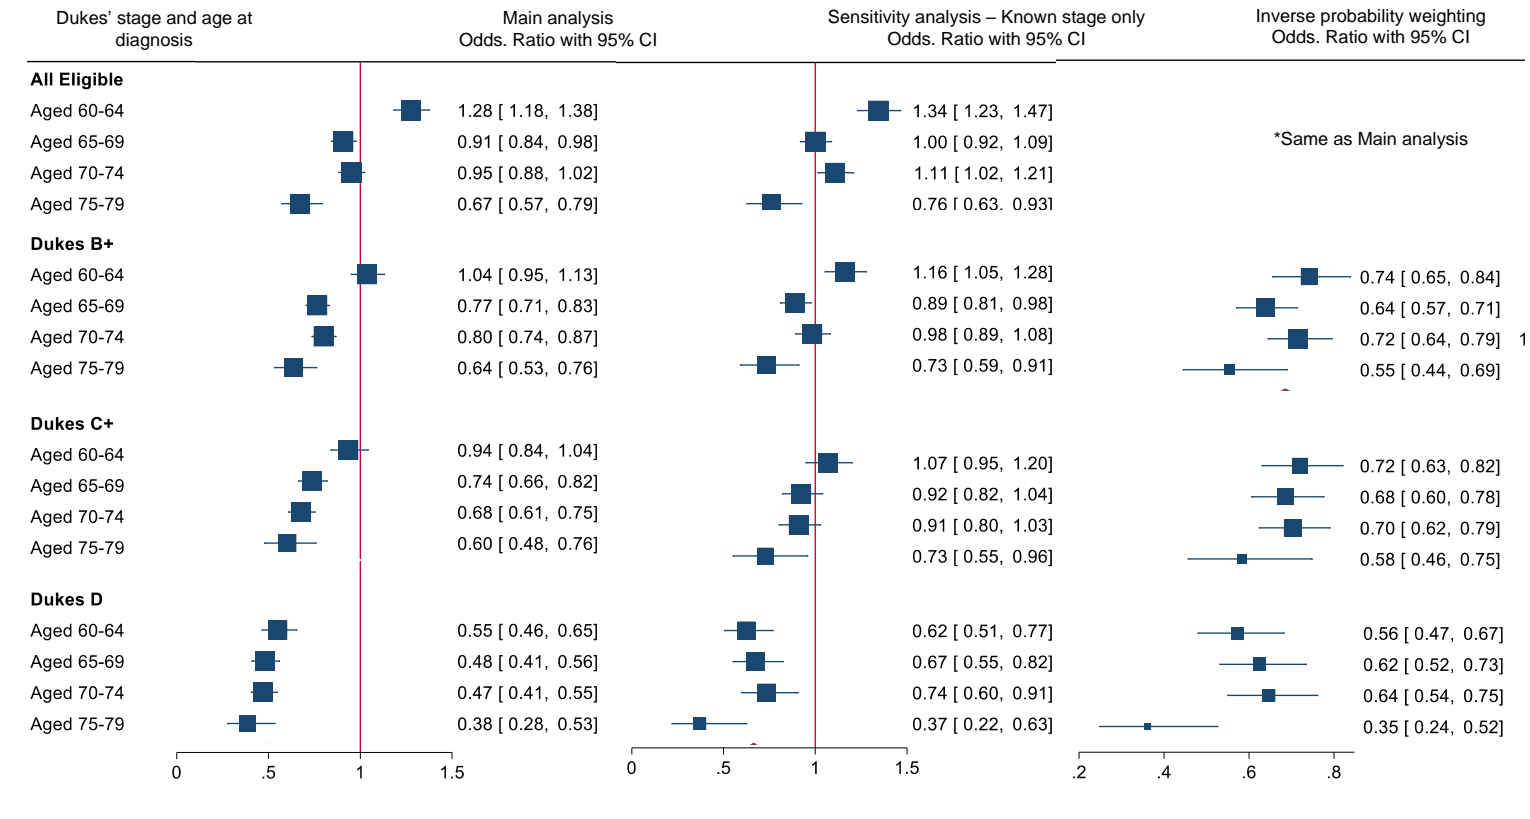



Supplementary Figure 2. Odds ratio of colorectal cancer among those screened by stage and gender in the main and sensitivity analysis.

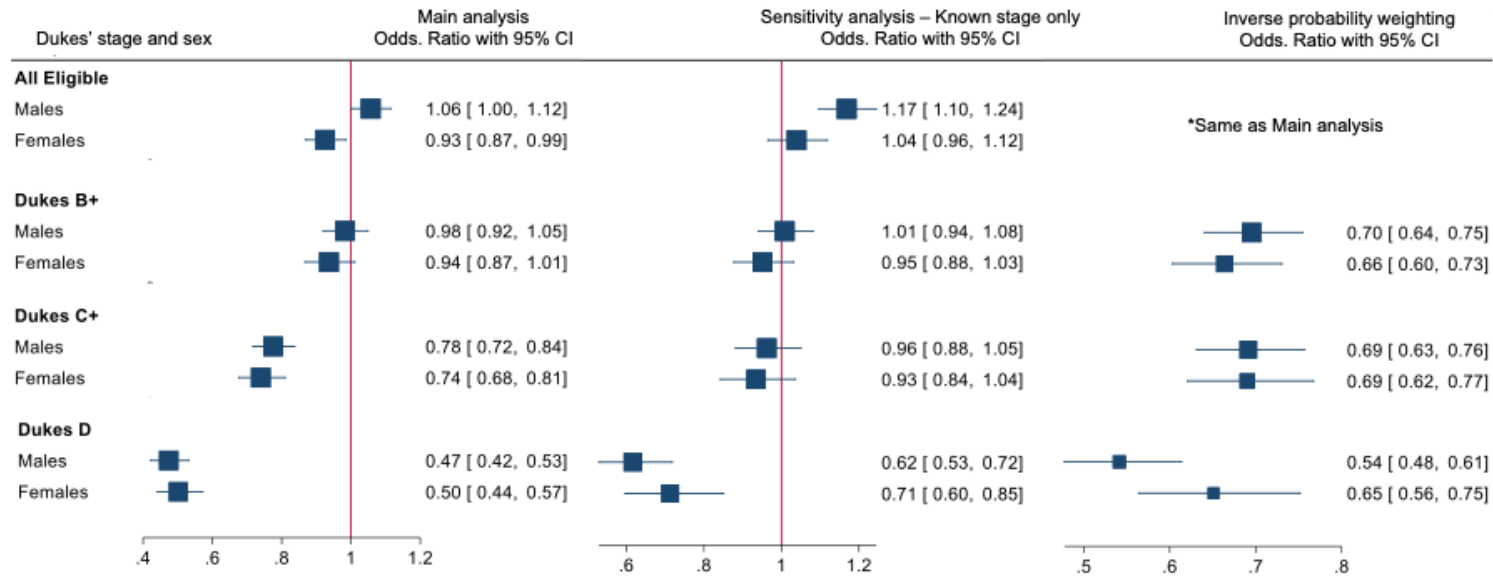

Supplement: djac100_supplementary_data.pdf [file djac100_supplementary_data.pdf]
